# Supplementary material
Source: MDPI journal article supplement (https://www.mdpi.com/2039-4403/13/2/72)
Supplement: s1 [file s1]

**Table S1: Results from the included studies**

|   | First author<br>year, country         | Study design                                                                                                                  | Participants (sample)<br>methods                                                                                                                                                                                                                                                                                                                                                                                                                                                                                                                                                                               | chronic disease/<br>Aim                                                                                                                             | Outcomes<br>Questionnaires                                                                                                                                                                    | Intervention (I)<br>Setting (S)                                                                                                                                                                                                                                                                                                                                                                                                                                                                                                                                                                                                                                                                                                                                                                                                           | Main findings                                                                                                                                                                                                                                                                                                                                                                                         |
|---|---------------------------------------|-------------------------------------------------------------------------------------------------------------------------------|----------------------------------------------------------------------------------------------------------------------------------------------------------------------------------------------------------------------------------------------------------------------------------------------------------------------------------------------------------------------------------------------------------------------------------------------------------------------------------------------------------------------------------------------------------------------------------------------------------------|-----------------------------------------------------------------------------------------------------------------------------------------------------|-----------------------------------------------------------------------------------------------------------------------------------------------------------------------------------------------|-------------------------------------------------------------------------------------------------------------------------------------------------------------------------------------------------------------------------------------------------------------------------------------------------------------------------------------------------------------------------------------------------------------------------------------------------------------------------------------------------------------------------------------------------------------------------------------------------------------------------------------------------------------------------------------------------------------------------------------------------------------------------------------------------------------------------------------------|-------------------------------------------------------------------------------------------------------------------------------------------------------------------------------------------------------------------------------------------------------------------------------------------------------------------------------------------------------------------------------------------------------|
| A | Moura et al.,<br>2019, Brasil<br>[43] | quasi-<br>experimental<br>study<br>pre-/ post<br>intervention                                                                 | Patients with type 2 diabetes<br>mellitus (at least six months)<br>from 30-69 years registered<br>in two units of Brazilian<br>Family Health Strategy<br>(Estratégia de Saúde da<br>Família, ESF) ESF <sup>1</sup> (sample:<br>n= 55) [44]<br><br>ESF's nurses (not further<br>specified) and researcher<br>(PhD in Nursing)<br><br>Measuring adherence to self-<br>care activities and functional<br>health literacy (FHL) in<br>proband four weeks after<br>receiving a nurse-led<br>intervention<br>->Categorization to FHL<br>levels<br>-> Means calculation<br>of days/week and FHL in<br>numeracy domain | type 2 diabetes<br>mellitus<br><br>Assessment of<br>diabetes self-care and<br>FHL and evaluation<br>of effects of an<br>educational<br>intervention | Questionário de<br>Atividades para<br>Autocuidado com o<br>Diabetes<br>(adapted, validated<br>version of the<br>Summary of<br>Diabetes Self-Care<br>Activities Measure<br>(SDSCA) for Brazil) | <b>I:</b> 3 sessions (each one about 1<br>hour) conducted by a ESF nurse<br>and a researcher in a weekly<br>interval (illustrated posters)<br>1. roundtable conversation<br>focusing on knowledge of the<br>causes/ course of diabetes and<br>complication prevention<br>2. roundtable discussion<br>focusing on diabetes self-care<br>intervention (e.g. healthy diet,<br>risks/ adherence to anti-<br>diabetics). Patients practiced<br>self-care measures.<br>3. conversation on foot care<br>using a case experience<br>(pro/contra points on diabetes<br>foot care). Followed by a<br>practical demonstration by the<br>nurse and researcher on<br>specialized foot care procedures<br>(active part).<br><b>S:</b> primary healthcare, at two<br>units of the Brazilian Family<br>Health Strategy (ESF) in Picos,<br>Piauí in Brazil | Total in sample had a<br>low level of FHL in<br>their daily self-care<br>activities<br><br>63.6% of the sample<br>were female and<br>59.29 years mean age<br><br>Effect on the<br>adherence in “foot<br>care/ shoe inspection”<br>(3.29 days/week<br>difference between<br>means and situated at<br>the analytical level of<br>FHL)<br><br>No increase in<br>“taking insulin shots<br>as recommended” |
| b | Yang et al,<br>2021 China<br>[45]     | study protocol for<br>a multicentred,<br>single-blind, two-<br>arm randomised<br>controlled trial<br>3 months of<br>follow-up | >60 years old multimorbid<br>persons (at least three<br>chronic conditions) with<br>at least one prescribed<br>pharmaceutical and self<br>managing their medications                                                                                                                                                                                                                                                                                                                                                                                                                                           | 38 different diseases<br>(not specified)<br>Testing a six-week<br>community nurse-led<br>medication self-<br>management strategy                    | PO: medication<br>adherence (5-item<br>Medication Adherence<br>Report Scale)<br>SO: Medication<br>knowledge (PKMUQ)                                                                           | <b>I:</b> Intervention with a patient-<br>centred approach delivered by<br>trained CHN in three face-to-<br>face education interviews (each<br>30-40 min) and 2 weekly follow-<br>up phone calls (10-20 min).                                                                                                                                                                                                                                                                                                                                                                                                                                                                                                                                                                                                                             | -/<br>Not described yet<br>(protocol)                                                                                                                                                                                                                                                                                                                                                                 |

<sup>1</sup> [44] Nunes J. Brazil: The Family Health Strategy. 2015 In: Medcalf A., et al. Health For All: The Journey of Universal Health Coverage. Hyderabad (IN): Orient Blackswan; Chapter 13.

|   |                                |                                                                                      |                                                                                                                                                                                                                                                                                                                                                                                           |                                                                                                                                                                                                                                  |                                                                                                                                                                                                                                                                                                                                |                                                                                                                                                                                                                                                                                                                                                                                                                                                               |                                                                                                                                                                                                                                                              |
|---|--------------------------------|--------------------------------------------------------------------------------------|-------------------------------------------------------------------------------------------------------------------------------------------------------------------------------------------------------------------------------------------------------------------------------------------------------------------------------------------------------------------------------------------|----------------------------------------------------------------------------------------------------------------------------------------------------------------------------------------------------------------------------------|--------------------------------------------------------------------------------------------------------------------------------------------------------------------------------------------------------------------------------------------------------------------------------------------------------------------------------|---------------------------------------------------------------------------------------------------------------------------------------------------------------------------------------------------------------------------------------------------------------------------------------------------------------------------------------------------------------------------------------------------------------------------------------------------------------|--------------------------------------------------------------------------------------------------------------------------------------------------------------------------------------------------------------------------------------------------------------|
|   |                                | N= estimated sample size: 120 patients (80% power with a two-sided $\alpha$ of 0.05) | Nonadherence to medications<br><br>Community nurses (CHN) will deliver the intervention<br>CHN: junior college degree or above with at least two years of experience in a community health centre (CHC) and daily practice in chronic disease management<br><br>Patients will be randomly allocated to either intervention group (usual care& intervention) or control group (usual care) | and its effect on the medication adherence in comparison to usual care<br><br>Evaluation of the intervention regarding the improvement of medication self-management capacity (medication knowledge) in comparison to usual care | Medication beliefs (BMQ), Medication social support (MSSS) Medication self-efficacy (SEAMS), Medication skills (self-developed scale), Medication treatment satisfaction (TSQM), Treatment burden (TBQ) Quality of life (EQ-5D-5L), Utilisation of healthcare services<br><br>exploring CHNs role in the medication management | 1. will determine barriers, inform on medication by the teach-back method<br>2. promote, motivate and empower patient's knowledge by motivational interviewing and encourage social/ family support<br>3. Motivating by planning coping strategies and communication skills on medication adherence<br>4. experience patient's difficulties in selfmanagement by active listening and a personalised feedback<br>S: 3 CHCs in primary care in Changsha, China |                                                                                                                                                                                                                                                              |
| c | Mohsen et al. 2021, Egypt [46] | Quasi-experimental study                                                             | adults 60 years and older with chronic diseases (n=140)<br><br>patients are randomly allocated to intervention (intervention) or and control group (usual care and receiving an educational intervention booklet at end of study)<br><br>intervention developed by the researcher (Community Health Nursing, Faculty of Nursing)                                                          | Diabetes mellitus and hypertension<br><br>exploring the effect of a health literacy intervention on the medication adherence .                                                                                                   | Interviews (survey tested for validity in a pilot study) on socio-demographic data and medical facts<br>Scale on Medication Adherence and the Scale on Self-Efficacy for Appropriate Medication Use<br>Measurement of blood glucose& blood pressure (once/ month in 12 weeks in both groups)                                   | I: three sessions (each 20- 30 minutes) in a group with 2- 5 Participants (each patient received an educational intervention booklet per session)<br>1. informing patients on diabetes mellitus and hypertension.<br>2. promoting diet/ exercise regimen for both diseases<br>3. information on medication adherence and affecting factors<br>S: Family health centre in Dragel village, Menoufia Governorate, Egypt                                          | Knowledge, self-efficacy, medication adherence improved significantly in the intervention group<br>decrease of mean blood glucose and mean systolic blood pressure in the intervention group compared to pre-intervention knowledge and to the control group |

|          |                                  |                                                                                                                      |                                                                                                                                                                                                                                      |                                                                                                                                                              |                                                                                                                                |                                                                                                                                                                                                                                                                                                                                                                                                                                                                                    |                                                                                                                                                                                        |
|----------|----------------------------------|----------------------------------------------------------------------------------------------------------------------|--------------------------------------------------------------------------------------------------------------------------------------------------------------------------------------------------------------------------------------|--------------------------------------------------------------------------------------------------------------------------------------------------------------|--------------------------------------------------------------------------------------------------------------------------------|------------------------------------------------------------------------------------------------------------------------------------------------------------------------------------------------------------------------------------------------------------------------------------------------------------------------------------------------------------------------------------------------------------------------------------------------------------------------------------|----------------------------------------------------------------------------------------------------------------------------------------------------------------------------------------|
| <b>d</b> | Smylie et al. 2018, Canada [47]  | single arm pre-post study<br><br>(sub study in an international trial on indigenous health services in NZ, AUS, CAN) | First Nations people at DHAC, 20 years or older with least one Cardiovascular event <b>or</b> ≥ 15% risk of CVD over the next 5 years and were prescribed at least two medication (statin, aspirin, ACE inhibitors or beta blockers) | Cardiovascular event (defined as angina pectoris, myocardial infarction, transient ischaemic attack or stroke)                                               | PO: Changes in mean knowledge of CVD medications between pre- and post-educational sessions<br><br>SO: changes in HL practices | <b>I:</b> three educational sessions <sup>2</sup> booklet, developed for the international trial (contained information on CVD diagnosis, medication use, treatment)<br>Application of an tablet with interactive opportunities (animations of stroke and heart disease pathology) and a client-specific pill card 28 days after the first session<br>The nurse actively encouraged clients to practice asking questions about their disease/medications (at health professionals) | effects on medication knowledge after all education sessions compared to baseline<br><br>about 90% of participants were able to use the medication booklet and about 50% the pill card |
|          |                                  |                                                                                                                      | Indigenous nurse who was trained in health literacy education including Indigenous adult literacy strategies<br><br>HL assessed by the nurse on a tablet application (i.e. customized pill card,)                                    | partnership with an Indigenous health service to test the effect of a customized, structured health literacy educational program addressing CVD medications. | Patients knowledge of CVD medications and their use,                                                                           | <b>S:</b> primary care, De dwa da dehs nye>s Health Access Centre (DHAC) in Hamilton and Brantford, Ontario, Canada.                                                                                                                                                                                                                                                                                                                                                               | positive impact in patients on answering questions about their medications<br><br>increased effort on communication with health professionals was not significant                      |
| <b>e</b> | Ballard et al. 2016, U.S.A. [27] | Brief report on practical recommendations (by a case example)                                                        | Oncology Nurse's Role in Health Literacy in patients with Cancer (Advanced Nursing Practitioners – ANP)                                                                                                                              | Cancer-diagnosis<br><br>Recommendation of appropriate methods for ANPs to promote health literacy in patients diagnosed with cancer                          | -/-                                                                                                                            | 1. Inform patient in plain language on the major objectives and repeat key messages<br>2. Handout written information material limited to three objectives<br>3. Both these strategies followed up by the teach-back method                                                                                                                                                                                                                                                        | -/-                                                                                                                                                                                    |
| <b>f</b> | Schäfer 2022, Austria [49]       | Brief report on promoting health literacy in chronic                                                                 | A framework is needed to define competencies in clinical/ community settings.                                                                                                                                                        | Example of nursing health counseling (nursing core competencies) in                                                                                          | -/-                                                                                                                            | -/-                                                                                                                                                                                                                                                                                                                                                                                                                                                                                | appropriate educational offerings (counseling and training) increase                                                                                                                   |

<sup>2</sup> [48] Details reported in: Crengle S., Smylie J. Kelaher M., Lambert M., Reid S., Luke J., Anderson I., Hindmarsh JH& Harwood M. Cardiovascular disease medication health literacy among Indigenous peoples: design and protocol of an intervention trial in Indigenous primary care service. **2014** MC Public Health, 14, 714.

|                                                    |                                 |                                                                                                                                                                                            |                                                                                                                                              |                                                                                                                        |                                                                                                                                            |                                                                                                                                                                                                                                                                                                                                                                                                                                                                                                                                                                                                                                                                                                                                                                                                                                   |
|----------------------------------------------------|---------------------------------|--------------------------------------------------------------------------------------------------------------------------------------------------------------------------------------------|----------------------------------------------------------------------------------------------------------------------------------------------|------------------------------------------------------------------------------------------------------------------------|--------------------------------------------------------------------------------------------------------------------------------------------|-----------------------------------------------------------------------------------------------------------------------------------------------------------------------------------------------------------------------------------------------------------------------------------------------------------------------------------------------------------------------------------------------------------------------------------------------------------------------------------------------------------------------------------------------------------------------------------------------------------------------------------------------------------------------------------------------------------------------------------------------------------------------------------------------------------------------------------|
|                                                    | diseases as a task of ANP       | Establishment of ANP/CHN is needed in Austria's healthcare as they are key players to promote health literacy by patient education and preventive care planning in patients and population | Austria to promote health literacy (e.g. theory- and concept-guided conversation strategies and conducting training sessions)                |                                                                                                                        |                                                                                                                                            | health literacy („health coaches“)                                                                                                                                                                                                                                                                                                                                                                                                                                                                                                                                                                                                                                                                                                                                                                                                |
| <b>Gray Literature (Thesis, project, brochure)</b> |                                 |                                                                                                                                                                                            |                                                                                                                                              |                                                                                                                        |                                                                                                                                            |                                                                                                                                                                                                                                                                                                                                                                                                                                                                                                                                                                                                                                                                                                                                                                                                                                   |
| <b>g</b>                                           | Ledesma, 2021, Austria [50]     | Master thesis<br><br>Qualitative study (Sample: n=9, focus group and experts interviews)                                                                                                   | Experts in education, health care and from research projects from Austria, Sweden, Germany and with several years of professional experience | Not specified<br><br>examines how an advanced counseling nurse can help improve health literacy at the community level | Six semi-structured guided expert interviews and one focus group with n=3 experts<br><br>Qualitative content analysis according to Mayring | Explicit CHN/ACN methods on health literacy mentioned in the interviews: (long-term and brief) coaching, (peer-to-peer) counseling, education, evaluation, systemic counseling, reflection, case management, network management participatory concepts<br><br>CHN can effectively operate in the living environment of the patients and identify needs in the community (a new legal framework for CHN is required)<br><br>bachelor/master degree can contribute to this expansion of competencies<br><br>CHN/ACN competencies in the primary setting: Communication has to be appropriate to patient's needs<br><br>to be able to provide information in a situation-flexible manner<br><br>information material should be used<br><br>evaluation of practiced strategies is recommended<br><br>networking activity is important |
| <b>h</b>                                           | Purvis, 2021 United States [51] | A Doctor of Nursing Practice Project                                                                                                                                                       | Adults from 18 years with type 2 diabetes mellitus (sample: n=7)<br><br><u>quality improvement project to evaluate self-management</u>       | type 2 diabetes mellitus<br>educating patients in self-management of their diabetes to                                 | After attending six educational classes, a survey was used to evaluate if an increase in confidence in                                     | <b>I:</b> six classes (each 1 hour)<br>1. information and discussion on diabetes symptoms and therapy<br>2. information on heart health and preventive strategies /<br><br>evidence that participants increased confidence                                                                                                                                                                                                                                                                                                                                                                                                                                                                                                                                                                                                        |

|                                                       |                                                         |                                                                                                                             |                                                                                                                                         |                                                                                                                                                                     |                                                                                                                                                                                                                                                                                                                                                                                                                                                 |                                                                    |
|-------------------------------------------------------|---------------------------------------------------------|-----------------------------------------------------------------------------------------------------------------------------|-----------------------------------------------------------------------------------------------------------------------------------------|---------------------------------------------------------------------------------------------------------------------------------------------------------------------|-------------------------------------------------------------------------------------------------------------------------------------------------------------------------------------------------------------------------------------------------------------------------------------------------------------------------------------------------------------------------------------------------------------------------------------------------|--------------------------------------------------------------------|
|                                                       |                                                         | education session for patients with diabetes in a rural community where no self management program on diabetes is available | increase their health literacy and to promote heart health, kidney health, nutrition and exercise and to increase their self-confidence | managing their chronic condition occurred.<br><br>Pre-/ post survey<br><br>Assessment of confidence level using a Likert scale from Self-Management Resource Center | lifestyle factors. Communication skills with healthcare providers<br>3. education on diabetes and association to kidney disease.<br>4. education on safely taking diabetes medication.Skills to communicate with primary provider<br>5. Information on healthy food. (supported by MyPlate image)<br>6. Example on an individual's daily exercise<br><br>S: Rural health centre in Defuniak Springs,Rural Walton County, Florida, United States | sample size of n= 7 may limit the generalizability of the results. |
| 9 German Nurses Association (DBfK) 2022, Germany [31] | Brochure on Community Health Nursing tasks and practice | Empower/ strengthen health literacy by community nurse-led approaches                                                       | -/-                                                                                                                                     | -/-                                                                                                                                                                 | Promote patient's and relatives health literacy by (individual) information and consultation, by planning events and training programmes and by providing educational materials<br><br>Accompaniment of quality-related community and urban development processes to improve health literacy in communities                                                                                                                                     | Recommendations on interventions                                   |
