# Supplementary material
Source: MDPI journal article supplement (https://www.mdpi.com/2039-4403/13/2/72)

**Figure S1: PRISMA Flowchart**

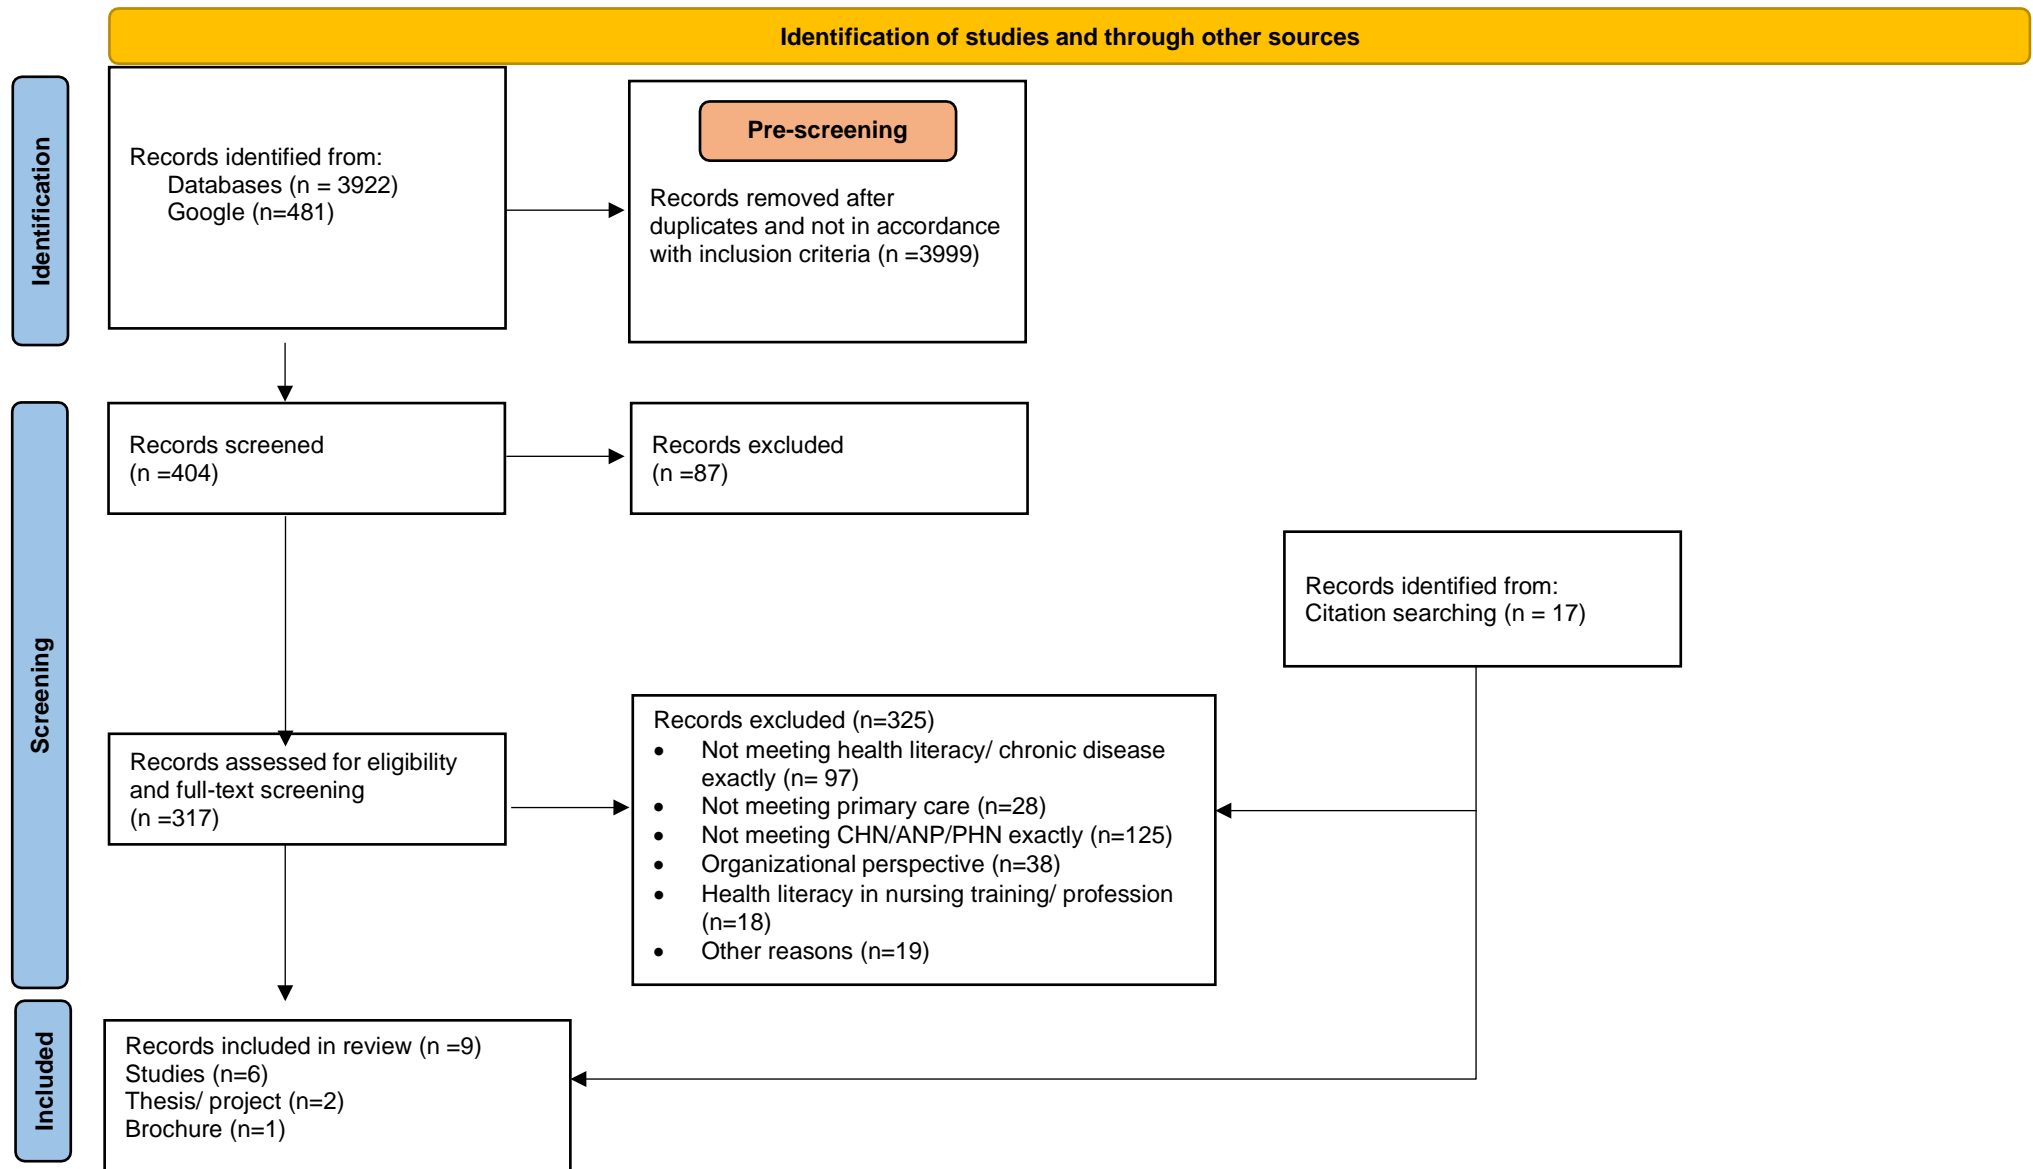

Supplement: s1 [file s1]
